## CORRIGENDUM

# Enhanced excitation-coupled $\text{Ca}^{2+}$ entry induces nuclear translocation of NFAT and contributes to IL-6 release from myotubes from patients with central core disease

Susan Treves, Mirko Vukcevic, Pierre-Yves Jeannot, Soledad Levano, Thierry Girard, Albert Urwyler, Dirk Fischer, Thomas Voit, Heinz Jungbluth, Sue Lillis, Francesco Muntoni, Ros Quinlivan, Anna Sarkozy, Kate Bushby and Francesco Zorzato

*Human Molecular Genetics* 2011 **20**:3; pp. 589–600; doi: 10.1093/hmg/ddq506

The Author apologises for the error in which the incorrect SNF Grant Number for this work was given. The correct Grant Number is SNF 310030-129785.
